# Supplementary material for: A high-throughput screen of inactive X chromosome reactivation identifies the enhancement of DNA demethylation by 5-aza-2′-dC upon inhibition of ribonucleotide reductase
Source: PubMed Central journal article supplement (PMC4604769; doi:10.1186/s13072-015-0034-4), 2015-10-13

A

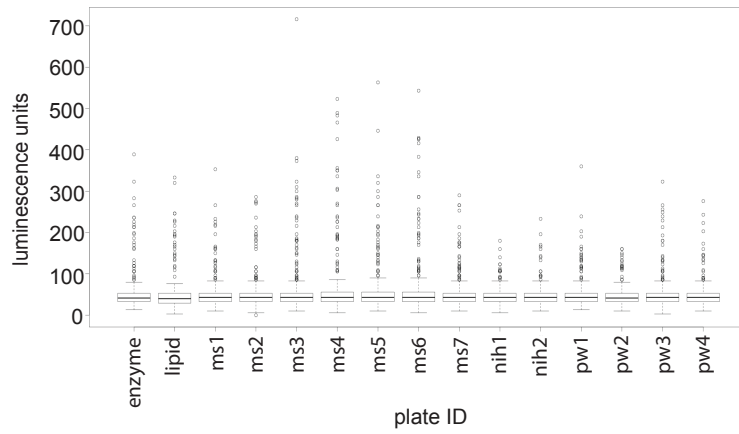

B

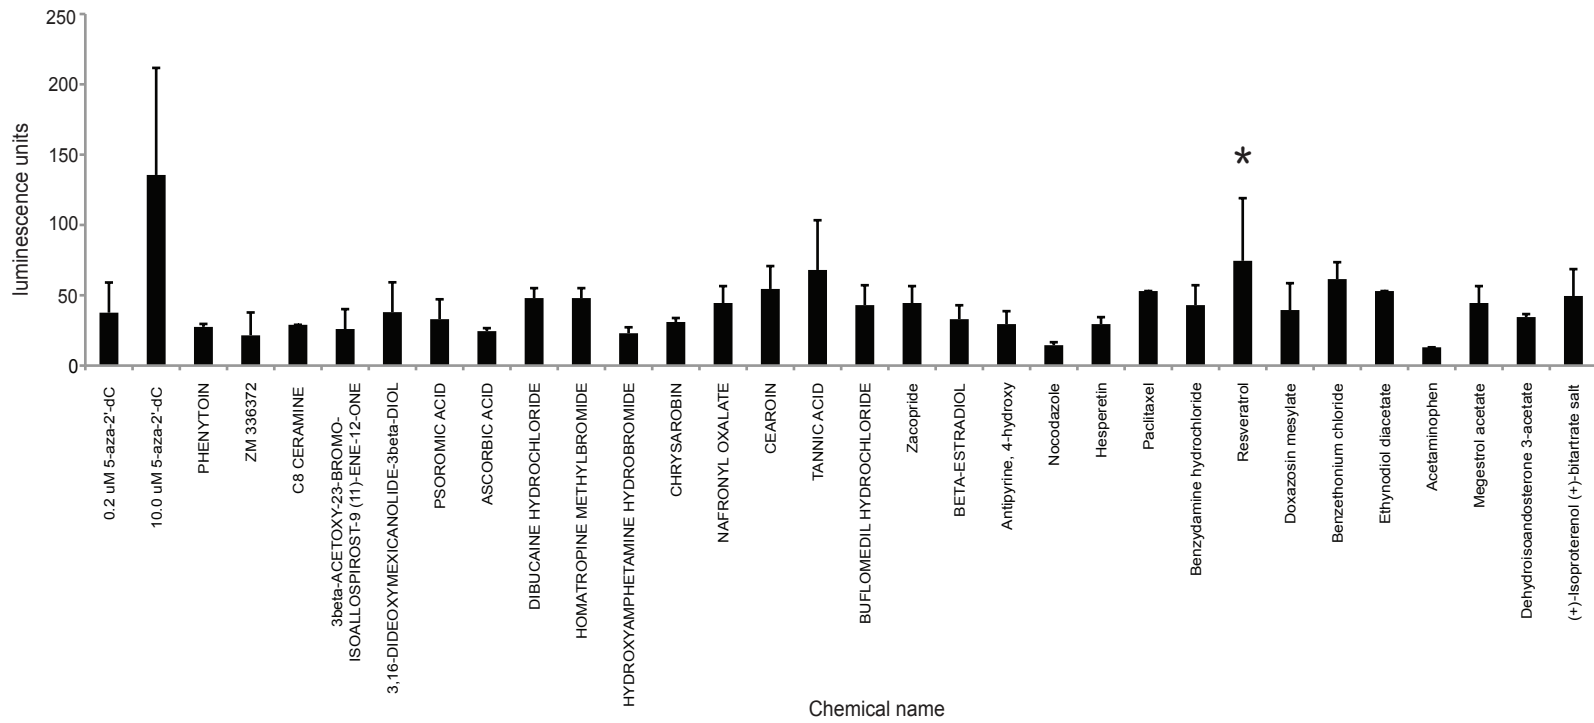

Supplement: 13072_2015_34_MOESM6_ESM.pdf [file 13072_2015_34_MOESM6_ESM.pdf]
